# Supplementary material for: A study on Forensic Pathology: Determining Cause of Death Through Heart Images
Source: Research Square preprint supplement (doi:10.21203/rs.3.rs-6491773/v1), 2025-05-28
Supplement: Supplementary file 1 [file ef816383bcaf7e2e876dd5a3.pdf]

# **Title: A study on Forensic Pathology: Determining Cause of Death Through Heart Images**

**Submission ID:** 3f63685c-77ef-45a1-9fb0-594118d6b604

The dataset generated and analysed during the current study are available in the <https://github.com/srinithyapadigela/Heart-Pathology-Dataset.git> repository. The images present in the dataset are taken from the website <https://heartpathology.com/> .
